# Supplementary material
Source: publisher site journal article supplement (http://content.karger.com/ProdukteDB/miscArchiv/000/215/878/Suppl.Material.pdf)
Supplement: Supplementary file 1 [file Suppl.Material.pdf]

## Supplementary file 1 – The effect of LPS on gene expression in PBMCs

\*\*\*

**Supplementary file 1a.** probe sets without detectable mRNA amounts in PBMCs without LPS (absent calls in the arrays from all six untreated samples) but up-regulated in cells after LPS stimulation (present in the arrays of all six LPS-treated samples).

|             |           |                      |                                                                                    |
|-------------|-----------|----------------------|------------------------------------------------------------------------------------|
| 201195_s_at | SLC7A5    | Hs.513797            | solute carrier family 7 (cationic amino acid transporter, y+ system), member 5     |
| 201464_x_at | JUN       | Hs.525704            | v-jun sarcoma virus 17 oncogene homolog (avian)                                    |
| 201466_s_at | JUN       | Hs.525704            | v-jun sarcoma virus 17 oncogene homolog (avian)                                    |
| 201564_s_at | FSCN1     | Hs.118400            | fascin homolog 1, actin-bundling protein (Strongylocentrotus purpuratus)           |
| 201693_s_at | EGR1      | Hs.326035            | early growth response 1                                                            |
| 201939_at   | PLK2      | Hs.398157            | polo-like kinase 2 (Drosophila)                                                    |
| 202067_s_at | LDLR      | Hs.213289, Hs.580083 | low density lipoprotein receptor (familial hypercholesterolemia)                   |
| 202859_x_at | IL8       | Hs.624, Hs.381219    | interleukin 8                                                                      |
| 202871_at   | TRAF4     | Hs.8375              | TNF receptor-associated factor 4                                                   |
| 202988_s_at | RGS1      | Hs.75256             | regulator of G-protein signalling 1                                                |
| 204080_at   | TOE1      | Hs.271353, Hs.288198 | target of EGR1, member 1 (nuclear)                                                 |
| 204348_s_at | AK3L1     | Hs.10862             | adenylate kinase 3-like 1                                                          |
| 204363_at   | F3        | Hs.62192             | coagulation factor III (thromboplastin, tissue factor)                             |
| 204413_at   | TRAF2     | Hs.522506            | TNF receptor-associated factor 2                                                   |
| 204896_s_at | PTGER4    | Hs.199248            | prostaglandin E receptor 4 (subtype EP4)                                           |
| 204958_at   | PLK3      | Hs.153640            | polo-like kinase 3 (Drosophila)                                                    |
| 205153_s_at | CD40      | Hs.472860            | CD40 antigen (TNF receptor superfamily member 5)                                   |
| 205193_at   | MAFF      | Hs.517617            | v-maf musculoaponeurotic fibrosarcoma oncogene homolog F (avian)                   |
| 205249_at   | EGR2      | Hs.1395              | early growth response 2 (Krox-20 homolog, Drosophila)                              |
| 205476_at   | CCL20     | Hs.75498             | chemokine (C-C motif) ligand 20                                                    |
| 205569_at   | LAMP3     | Hs.518448            | lysosomal-associated membrane protein 3                                            |
| 205973_at   | FEZ1      | Hs.224008            | fasciculation and elongation protein zeta 1 (zygin I)                              |
| 206173_x_at | GABPB2    | Hs.569490            | GA binding protein transcription factor, beta subunit 2                            |
| 206359_at   | SOCS3     | Hs.527973            | suppressor of cytokine signaling 3                                                 |
| 206360_s_at | SOCS3     | Hs.527973            | suppressor of cytokine signaling 3                                                 |
| 206975_at   | LTA       | Hs.36                | lymphotoxin alpha (TNF superfamily, member 1)                                      |
| 207442_at   | CSF3      | Hs.2233              | colony stimulating factor 3 (granulocyte)                                          |
| 207850_at   | CXCL3     | Hs.89690             | chemokine (C-X-C motif) ligand 3                                                   |
| 207978_s_at | NR4A3     | Hs.279522            | nuclear receptor subfamily 4, group A, member 3                                    |
| 208173_at   | IFNB1     | Hs.93177             | interferon, beta 1, fibroblast                                                     |
| 209324_s_at | RGS16     | Hs.413297            | regulator of G-protein signalling 16                                               |
| 209774_x_at | CXCL2     | Hs.75765             | chemokine (C-X-C motif) ligand 2                                                   |
| 209803_s_at | PHLDA2    | Hs.154036            | pleckstrin homology-like domain, family A, member 2                                |
| 209850_s_at | CDC42EP2  | Hs.343380            | CDC42 effector protein (Rho GTPase binding) 2                                      |
| 210118_s_at | IL1A      | Hs.1722              | interleukin 1, alpha                                                               |
| 210662_at   | KYNU      | Hs.470126            | kynureninase (L-kynurenine hydrolase)                                              |
| 210953_at   | TSC22D2   | Hs.52526             | TSC22 domain family, member 2                                                      |
| 211122_s_at | CXCL11    | Hs.518814            | chemokine (C-X-C motif) ligand 11                                                  |
| 211506_s_at | IL8       | Hs.624, Hs.381219    | interleukin 8                                                                      |
| 213568_at   | OSR2      | Hs.253247            | odd-skipped related 2 (Drosophila)                                                 |
| 213758_at   | COX4I1    | Hs.433419            | cytochrome c oxidase subunit IV isoform 1                                          |
| 214062_x_at | NFKBIB    | Hs.9731              | nuclear factor of kappa light polypeptide gene enhancer in B-cells inhibitor, beta |
| 214446_at   | ELL2      | Hs.192221            | elongation factor, RNA polymerase II, 2                                            |
| 214448_x_at | NFKBIB    | Hs.9731              | nuclear factor of kappa light polypeptide gene enhancer in B-cells inhibitor, beta |
| 215078_at   | SOD2      | Hs.487046, Hs.589976 | superoxide dismutase 2, mitochondrial                                              |
| 215462_at   | LOC149478 | Hs.421430            |                                                                                    |
| 215853_at   | SDCCAG8   | Hs.555913            | serologically defined colon cancer antigen 8                                       |
| 216248_s_at | NR4A2     | Hs.165258            | nuclear receptor subfamily 4, group A, member 2                                    |
| 216834_at   | RGS1      | Hs.75256             | regulator of G-protein signalling 1                                                |
| 217173_s_at | LDLR      | Hs.213289, Hs.580083 | low density lipoprotein receptor (familial hypercholesterolemia)                   |
| 219258_at   | FLJ20516  | Hs.426696            |                                                                                    |
| 220322_at   | IL1F9     | Hs.211238            | interleukin 1 family, member 9                                                     |
| 220655_at   | TNIP3     | Hs.208206            | TNFAIP3 interacting protein 3                                                      |
| 220882_at   |           |                      |                                                                                    |
| 221143_at   | RPA4      | Hs.534452            | replication protein A4, 34kDa                                                      |
| 221877_at   |           |                      |                                                                                    |
| 222068_s_at | LRRRC50   | Hs.310164            | leucine rich repeat containing 50                                                  |
| 222301_at   | C1orf61   | Hs.380027            | chromosome 1 open reading frame 61                                                 |
| 38158_at    | ESPL1     | Hs.153479            | extra spindle poles like 1 (S. cerevisiae)                                         |
| 41469_at    | PI3       | Hs.112341            | peptidase inhibitor 3, skin-derived (SKALP)                                        |

**Supplementary file 1b.** Probe sets with present calls in cells that were not treated with LPS (present in all six arrays), but no detectable mRNA signals in all arrays from LPS-stimulated PBMCs.

|             |          |           |                                                                                                            |
|-------------|----------|-----------|------------------------------------------------------------------------------------------------------------|
| 201420_s_at | WDR77    | Hs.204773 | WD repeat domain 77                                                                                        |
| 201896_s_at | PSRC1    | Hs.405925 | proline/serine-rich coiled-coil 1                                                                          |
| 202512_s_at | ATG5     | Hs.486063 | ATG5 autophagy related 5 homolog (S. cerevisiae)                                                           |
| 203128_at   | SPTLC2   | Hs.435661 | serine palmitoyltransferase, long chain base subunit 2                                                     |
| 203245_s_at | TUSC4    | Hs.437083 | tumor suppressor candidate 4                                                                               |
| 203720_s_at | ERCC1    | Hs.435981 | excision repair cross-complementing rodent repair deficiency, complementation group 1                      |
| 204227_s_at | TK2      | Hs.512619 | thymidine kinase 2, mitochondrial                                                                          |
| 204247_s_at | CDK5     | Hs.166071 | cyclin-dependent kinase 5                                                                                  |
| 204301_at   | KBTBD11  | Hs.5333   | kelch repeat and BTB (POZ) domain containing 11                                                            |
| 204554_at   | PPP1R3D  | Hs.42215  | protein phosphatase 1, regulatory subunit 3D                                                               |
| 204982_at   | GIT2     | Hs.434996 | G protein-coupled receptor kinase interactor 2                                                             |
| 205960_at   | PDK4     | Hs.8364   | pyruvate dehydrogenase kinase, isozyme 4                                                                   |
| 206037_at   | CCBL1    | Hs.495250 | c("cysteine conjugate-beta lyase", " cytoplasmic (glutamine transaminase K, kynurenine aminotransferase)") |
| 208466_at   | RAB3D    | Hs.567397 | RAB3D, member RAS oncogene family                                                                          |
| 209264_s_at | TSPAN4   | Hs.26518  | tetraspanin 4                                                                                              |
| 209759_s_at | DCI      | Hs.403436 | dodecenoyl-Coenzyme A delta isomerase (3,2 trans-enoyl-Coenzyme A isomerase)                               |
| 210220_at   | FZD2     | Hs.142912 | frizzled homolog 2 (Drosophila)                                                                            |
| 210306_at   | L3MBTL   | Hs.300863 | l(3)mbt-like (Drosophila)                                                                                  |
| 212845_at   | SAMD4A   | Hs.98259  | sterile alpha motif domain containing 4A                                                                   |
| 213131_at   | OLFM1    | Hs.522484 | olfactomedin 1                                                                                             |
| 213351_s_at | TMCC1    | Hs.477547 | transmembrane and coiled-coil domain family 1                                                              |
| 214793_at   | DUSP7    | Hs.3843   | dual specificity phosphatase 7                                                                             |
| 214947_at   | FAM105A  | Hs.155085 | family with sequence similarity 105, member A                                                              |
| 215232_at   | KIAA0672 | Hs.499758 |                                                                                                            |
| 215253_s_at | DSCR1    | Hs.282326 | Down syndrome critical region gene 1                                                                       |
| 216733_s_at | GATM     | Hs.75335  | glycine amidinotransferase (L-arginine:glycine amidinotransferase)                                         |
| 218115_at   | ASF1B    | Hs.26516  | ASF1 anti-silencing function 1 homolog B (S. cerevisiae)                                                   |
| 218504_at   | FAHD2A   | Hs.546387 | fumarylacetoacetate hydrolase domain containing 2A                                                         |
| 218689_at   | FANCF    | Hs.523543 | Fanconi anemia, complementation group F                                                                    |
| 218953_s_at | MGC3265  | Hs.483796 |                                                                                                            |
| 219344_at   | SLC29A3  | Hs.438419 | solute carrier family 29 (nucleoside transporters), member 3                                               |
| 219496_at   | C2orf26  | Hs.355455 | chromosome 2 open reading frame 26                                                                         |
| 219714_s_at | CACNA2D3 | Hs.128594 | calcium channel, voltage-dependent, alpha 2/delta 3 subunit                                                |
| 220326_s_at | FLJ10357 | Hs.35125  |                                                                                                            |
| 220936_s_at | H2AFJ    | Hs.524280 | H2A histone family, member J                                                                               |
| 222058_at   | RNF130   | Hs.484363 | ring finger protein 130                                                                                    |

**Supplementary file 1c.** Genes that were most strongly affected by LPS treatment (absolute logFC > 4). Gene expression upon LPS was compared with base level gene expression in control samples. In cells from stroke survivors all these genes had absolute logFC > 4, too (similar logFC values and ranking).

|             | logFC |          |                      |                                                                                                           |
|-------------|-------|----------|----------------------|-----------------------------------------------------------------------------------------------------------|
| 205476_at   | 10,75 | CCL20    | Hs.75498             | chemokine (C-C motif) ligand 20                                                                           |
| 211506_s_at | 10,35 | IL8      | Hs.624, Hs.381219    | interleukin 8                                                                                             |
| 206025_s_at | 9,92  | TNFAIP6  | Hs.437322            | tumor necrosis factor, alpha-induced protein 6                                                            |
| 209774_x_at | 9,68  | CXCL2    | Hs.75765             | chemokine (C-X-C motif) ligand 2                                                                          |
| 202859_x_at | 9,54  | IL8      | Hs.624, Hs.381219    | interleukin 8                                                                                             |
| 205207_at   | 9,54  | IL6      | Hs.512234            | interleukin 6 (interferon, beta 2)                                                                        |
| 210118_s_at | 9,44  | IL1A     | Hs.1722              | interleukin 1, alpha                                                                                      |
| 207850_at   | 9,3   | CXCL3    | Hs.89690             | chemokine (C-X-C motif) ligand 3                                                                          |
| 206026_s_at | 8,93  | TNFAIP6  | Hs.437322            | tumor necrosis factor, alpha-induced protein 6                                                            |
| 204470_at   | 8,5   | CXCL1    | Hs.789               | chemokine (C-X-C motif) ligand 1 (melanoma growth stimulating activity, alpha)                            |
| 213524_s_at | 8,5   | G0S2     | Hs.432132            | G0/G1switch 2                                                                                             |
| 39402_at    | 8,26  | IL1B     | Hs.126256            | interleukin 1, beta                                                                                       |
| 206157_at   | 8,26  | PTX3     | Hs.567326            | pentraxin-related gene, rapidly induced by IL-1 beta                                                      |
| 205067_at   | 8,09  | IL1B     | Hs.126256            | interleukin 1, beta                                                                                       |
| 221345_at   | 7,97  | FFAR2    | Hs.248056            | free fatty acid receptor 2                                                                                |
| 207113_s_at | 7,62  | TNF      | Hs.241570            | tumor necrosis factor (TNF superfamily, member 2)                                                         |
| 205114_s_at | 7,04  | CCL3     | Hs.514107            | chemokine (C-C motif) ligand 3                                                                            |
| 204440_at   | 6,94  | CD83     | Hs.484703            | CD83 antigen (activated B lymphocytes, immunoglobulin superfamily)                                        |
| 211434_s_at | 6,83  | CCRL2    | Hs.458436, Hs.535713 | chemokine (C-C motif) receptor-like 2                                                                     |
| 215078_at   | 6,79  | SOD2     | Hs.487046, Hs.589976 | superoxide dismutase 2, mitochondrial                                                                     |
| 207901_at   | 6,72  | IL12B    | Hs.674               | interleukin 12B (natural killer cell stimulatory factor 2, cytotoxic lymphocyte maturation factor 2, p40) |
| 36711_at    | 6,59  | MAFF     | Hs.517617            | v-maf musculoaponeurotic fibrosarcoma oncogene homolog F (avian)                                          |
| 204748_at   | 6,52  | PTGS2    | Hs.196384            | prostaglandin-endoperoxide synthase 2 (prostaglandin G/H synthase and cyclooxygenase)                     |
| 214349_at   | 6,5   |          |                      |                                                                                                           |
| 201694_s_at | 6,42  | EGR1     | Hs.326035            | early growth response 1                                                                                   |
| 204533_at   | 6,06  | CXCL10   | Hs.413924            | chemokine (C-X-C motif) ligand 10                                                                         |
| 202912_at   | 6,05  | ADM      | Hs.441047            | adrenomedullin                                                                                            |
| 212659_s_at | 5,99  | IL1RN    | Hs.81134             | interleukin 1 receptor antagonist                                                                         |
| 220882_at   | 5,94  |          |                      |                                                                                                           |
| 220655_at   | 5,94  | TNIP3    | Hs.208206            | TNFAIP3 interacting protein 3                                                                             |
| 205220_at   | 5,91  | GPR109B  | Hs.458425            | G protein-coupled receptor 109B                                                                           |
| 210354_at   | 5,86  | IFNG     | Hs.856               | interferon, gamma                                                                                         |
| 222301_at   | 5,72  | C1orf61  | Hs.380027            | chromosome 1 open reading frame 61                                                                        |
| 216243_s_at | 5,63  | IL1RN    | Hs.81134             | interleukin 1 receptor antagonist                                                                         |
| 202638_s_at | 5,53  | ICAM1    | Hs.515126, Hs.579817 | intercellular adhesion molecule 1 (CD54), human rhinovirus receptor                                       |
| 202014_at   | 5,52  | PPP1R15A | Hs.76556             | protein phosphatase 1, regulatory (inhibitor) subunit 15A                                                 |
| 212657_s_at | 5,48  | IL1RN    | Hs.81134             | interleukin 1 receptor antagonist                                                                         |
| 203394_s_at | 5,22  | HES1     | Hs.250666            | hairly and enhancer of split 1, (Drosophila)                                                              |
| 206765_at   | 5,16  | KCNJ2    | Hs.1547              | potassium inwardly-rectifying channel, subfamily J, member 2                                              |
| 218810_at   | 5,12  | ZC3H12A  | Hs.471918            | zinc finger CCCH-type containing 12A                                                                      |
| 222068_s_at | 5,1   | LRRRC50  | Hs.310164            | leucine rich repeat containing 50                                                                         |
| 204363_at   | 5,1   | F3       | Hs.62192             | coagulation factor III (thromboplastin, tissue factor)                                                    |
| 37028_at    | 5,04  | PPP1R15A | Hs.76556             | protein phosphatase 1, regulatory (inhibitor) subunit 15A                                                 |
| 207794_at   | -5,02 | CCR2     | Hs.395, Hs.511794    | chemokine (C-C motif) receptor 2                                                                          |
| 205193_at   | 4,97  | MAFF     | Hs.517617            | v-maf musculoaponeurotic fibrosarcoma oncogene homolog F (avian)                                          |
| 202071_at   | 4,94  | SDC4     | Hs.252189            | syndecan 4 (amphiglycan, ryudocan)                                                                        |
| 201631_s_at | 4,93  | IER3     | Hs.76095             | immediate early response 3                                                                                |
| 220054_at   | 4,84  | IL23A    | Hs.98309             | interleukin 23, alpha subunit p19                                                                         |
| 201693_s_at | 4,77  | EGR1     | Hs.326035            | early growth response 1                                                                                   |
| 205767_at   | 4,73  | EREG     | Hs.115263            | epiregulin                                                                                                |
| 206359_at   | 4,7   | SOCS3    | Hs.527973            | suppressor of cytokine signaling 3                                                                        |
| 202637_s_at | 4,69  | ICAM1    | Hs.515126, Hs.579817 | intercellular adhesion molecule 1 (CD54), human rhinovirus receptor                                       |
| 204103_at   | 4,57  | CCL4     | Hs.75703             | chemokine (C-C motif) ligand 4                                                                            |
| 201464_x_at | 4,53  | JUN      | Hs.525704            | v-jun sarcoma virus 17 oncogene homolog (avian)                                                           |
| 208173_at   | 4,51  | IFNB1    | Hs.93177             | interferon, beta 1, fibroblast                                                                            |
| 202672_s_at | 4,46  | ATF3     | Hs.460               | activating transcription factor 3                                                                         |
| 219312_s_at | 4,36  | ZBTB10   | Hs.205742            | zinc finger and BTB domain containing 10                                                                  |
| 215485_s_at | 4,34  | ICAM1    | Hs.515126, Hs.57981  | intercellular adhesion molecule 1 (CD54), human rhinovirus receptor                                       |
| 204614_at   | 4,24  | SERPINB2 | Hs.514913            | serpin peptidase inhibitor, clade B (ovalbumin), member 2                                                 |
| 204794_at   | 4,23  | DUSP2    | Hs.1183              | dual specificity phosphatase 2                                                                            |
| 202643_s_at | 4,21  | TNFAIP3  | Hs.211600            | tumor necrosis factor, alpha-induced protein 3                                                            |
| 201195_s_at | 4,19  | SLC7A5   | Hs.513797            | solute carrier family 7 (cationic amino acid transporter, y+ system), member 5                            |
| 212099_at   | -4,07 | RHOB     | Hs.502876            | ras homolog gene family, member B                                                                         |

**Supplementary file 1d.** Probe sets with absolute logFC > 4 in a comparison of survivors (LPS treated versus untreated cells), that did not show an absolute logFC > 4 in control subjects.

|             | logFC |         |                      |                                                                                                                                    |
|-------------|-------|---------|----------------------|------------------------------------------------------------------------------------------------------------------------------------|
| 214746_s_at | -5,25 | ZNF467  | Hs.112158            | zinc finger protein 467                                                                                                            |
| 216834_at   | 4,96  | RGS1    | Hs.75256             | regulator of G-protein signalling 1                                                                                                |
| 203096_s_at | 4,82  | RAPGEF2 | Hs.113912            | Rap guanine nucleotide exchange factor (GEF) 2                                                                                     |
| 211122_s_at | 4,62  | CXCL11  | Hs.518814            | chemokine (C-X-C motif) ligand 11                                                                                                  |
| 205569_at   | 4,58  | LAMP3   | Hs.518448            | lysosomal-associated membrane protein 3                                                                                            |
| 204285_s_at | 4,57  | PMAIP1  | Hs.96                | phorbol-12-myristate-13-acetate-induced protein 1                                                                                  |
| 209803_s_at | 4,57  | PHLDA2  | Hs.154036            | pleckstrin homology-like domain, family A, member 2                                                                                |
| 204286_s_at | 4,56  | PMAIP1  | Hs.96                | phorbol-12-myristate-13-acetate-induced protein 1                                                                                  |
| 205249_at   | 4,49  | EGR2    | Hs.1395              | early growth response 2 (Krox-20 homolog, Drosophila)                                                                              |
| 216015_s_at | 4,48  | CIAS1   | Hs.159483            | cold autoinflammatory syndrome 1                                                                                                   |
| 203504_s_at | 4,47  | ABCA1   | Hs.429294, Hs.522675 | ATP-binding cassette, sub-family A (ABC1), member 1                                                                                |
| 220322_at   | 4,43  | IL1F9   | Hs.211238            | interleukin 1 family, member 9                                                                                                     |
| 205205_at   | 4,4   | RELB    | Hs.307905            | v-rel reticuloendotheliosis viral oncogene homolog B, nuclear factor of kappa light polypeptide gene enhancer in B-cells 3 (avian) |
| 205660_at   | 4,35  | OASL    | Hs.118633            | 2'-5'-oligoadenylate synthetase-like                                                                                               |
| 205306_x_at | 4,34  | KMO     | Hs.409081            | kynurenine 3-monooxygenase (kynurenine 3-hydroxylase)                                                                              |
| 211138_s_at | 4,25  | KMO     | Hs.409081            | kynurenine 3-monooxygenase (kynurenine 3-hydroxylase)                                                                              |
| 219869_s_at | 4,25  | SLC39A8 | Hs.288034            | solute carrier family 39 (zinc transporter), member 8                                                                              |
| 217502_at   | 4,12  | IFIT2   | Hs.437609            | interferon-induced protein with tetratricopeptide repeats 2                                                                        |
| 206978_at   | -4,11 | CCR2    | Hs.395, Hs.511794    | chemokine (C-C motif) receptor 2                                                                                                   |
| 207075_at   | 4,06  | CIAS1   | Hs.159483            | cold autoinflammatory syndrome 1                                                                                                   |
| 209267_s_at | 4,05  | SLC39A8 | Hs.288034            | solute carrier family 39 (zinc transporter), member 8                                                                              |
| 201564_s_at | 4,04  | FSCN1   | Hs.118400            | fascin homolog 1, actin-bundling protein (Strongylocentrotus purpuratus)                                                           |
| 210933_s_at | 4,04  | MGC4655 | Hs.555997            |                                                                                                                                    |
| 209305_s_at | 4,03  | GADD45B | Hs.110571            | growth arrest and DNA-damage-inducible, beta                                                                                       |

**Supplementary file 2. Differential base level gene expression and LPS-responsiveness in PBMCs of stroke survivors and control subjects – analysis of single probe sets**

\*\*\*

**Supplementary file 2a. Probe sets with absolute logFC > 1 (comparison between survivors and controls). Base level gene expression**

|             | logFC | p-value |         |                      |                                                                          |
|-------------|-------|---------|---------|----------------------|--------------------------------------------------------------------------|
| 206700_s_at | 2,56  | 0,08    | SMCY    | Hs.80358             | Smcy homolog, Y-linked (mouse)                                           |
| 205000_at   | 2,39  | 0,05    | DDX3Y   | Hs.99120             | DEAD (Asp-Glu-Ala-Asp) box polypeptide 3, Y-linked                       |
| 204409_s_at | 1,96  | 0,04    | EIF1AY  | Hs.461178            | eukaryotic translation initiation factor 1A, Y-linked                    |
| 201909_at   | 1,83  | 0,09    | RPS4Y1  | Hs.282376            | ribosomal protein S4, Y-linked 1                                         |
| 214218_s_at | -1,74 | 0,05    | XIST    | Hs.529901            | X (inactive)-specific transcript                                         |
| 221728_x_at | -1,61 | 0,08    | XIST    | Hs.529901            | X (inactive)-specific transcript                                         |
| 201123_s_at | 1,57  | 0,07    | EIF5A   | Hs.534314            | eukaryotic translation initiation factor 5A                              |
| 214055_x_at | -1,45 | 0,25    | BAT2D1  | Hs.494614            | BAT2 domain containing 1                                                 |
| 210790_s_at | -1,44 | 0,02    | SAR1A   | Hs.499960            | SAR1 gene homolog A (S. cerevisiae)                                      |
| 205033_s_at | 1,43  | 0,25    | DEFA1   | Hs.294176, Hs.380781 | defensin, alpha 1                                                        |
| 204848_x_at | -1,3  | 0,16    | HBG1    | Hs.302145, Hs.567283 | hemoglobin, gamma A                                                      |
| 204419_x_at | -1,27 | 0,15    | HBG2    | Hs.302145            | hemoglobin, gamma G                                                      |
| 211948_x_at | -1,27 | 0,25    | BAT2D1  | Hs.494614            | BAT2 domain containing 1                                                 |
| 213756_s_at | 1,22  | 0,02    | HSF1    | Hs.406068, Hs.530227 | heat shock transcription factor 1                                        |
| 219629_at   | 1,22  | 0,28    | C22orf8 | Hs.265018, Hs.589548 | chromosome 22 open reading frame 8                                       |
| 220342_x_at | -1,2  | 0,16    |         |                      |                                                                          |
| 204351_at   | 1,2   | 0,12    | S100P   | Hs.2962              | S100 calcium binding protein P                                           |
| 207824_s_at | 1,17  | 0,03    | MAZ     | Hs.23650             | MYC-associated zinc finger protein (purine-binding transcription factor) |
| 216629_at   | 1,15  | 0,1     | SRRM2   | Hs.433343, Hs.525557 | serine/arginine repetitive matrix 2                                      |
| 217412_at   | -1,04 | 0,13    |         |                      |                                                                          |
| 214833_at   | -1,02 | 0,05    | TMEM63A | Hs.119387            | transmembrane protein 63A                                                |
| 201730_s_at | -1,02 | 0,27    | TPR     | Hs.279640            | translocated promoter region (to activated MET oncogene)                 |
| 209569_x_at | -1,01 | 0,16    | D4S234E | Hs.518595            |                                                                          |

**Supplementary file 2b.** Probe sets with absolute logFC > 1 (comparison between survivors and controls). LPS-responsiveness.

|             | logFC | p-value |           |                      |                                                                                                           |
|-------------|-------|---------|-----------|----------------------|-----------------------------------------------------------------------------------------------------------|
| 211122_s_at | 3,13  | 0,03    | CXCL11    | Hs.518814            | chemokine (C-X-C motif) ligand 11                                                                         |
| 213568_at   | 2,13  | 0       | OSR2      | Hs.253247            | odd-skipped related 2 (Drosophila)                                                                        |
| 34478_at    | -2,1  | 0,19    | RAB11B    | Hs.433888            | RAB11B, member RAS oncogene family                                                                        |
| 217176_s_at | 2,09  | 0,03    | ZFX       | Hs.370424            | zinc finger protein, X-linked                                                                             |
| 207442_at   | 2,07  | 0,03    | CSF3      | Hs.2233              | colony stimulating factor 3 (granulocyte)                                                                 |
| 207824_s_at | -2,05 | 0,05    | MAZ       | Hs.23650             | MYC-associated zinc finger protein (purine-binding transcription factor)                                  |
| 212458_at   | 2,04  | 0,1     | SPRED2    | Hs.59332             | sprouty-related, EVH1 domain containing 2                                                                 |
| 214149_s_at | -1,93 | 0,13    | ATP6V0E   | Hs.484188            | ATPase, H+ transporting, lysosomal 9kDa, V0 subunit e                                                     |
| 211139_s_at | 1,92  | 0,05    | NAB1      | Hs.107474            | NGFI-A binding protein 1 (EGR1 binding protein 1)                                                         |
| 206134_at   | 1,92  | 0,25    | ADAMDEC1  | Hs.521459            | ADAM-like, decysin 1                                                                                      |
| 216629_at   | -1,83 | 0,18    | SRRM2     | Hs.433343, Hs.525557 | serine/arginine repetitive matrix 2                                                                       |
| 213756_s_at | -1,82 | 0,04    | HSF1      | Hs.406068, Hs.530227 | heat shock transcription factor 1                                                                         |
| 201627_s_at | 1,8   | 0       | INSIG1    | Hs.520819            | insulin induced gene 1                                                                                    |
| 213797_at   | 1,77  | 0,23    | RSAD2     | Hs.17518             | radical S-adenosyl methionine domain containing 2                                                         |
| 205249_at   | 1,74  | 0,04    | EGR2      | Hs.1395              | early growth response 2 (Krox-20 homolog, Drosophila)                                                     |
| 210163_at   | 1,68  | 0,27    | CXCL11    | Hs.518814            | chemokine (C-X-C motif) ligand 11                                                                         |
| 220342_x_at | 1,68  | 0,07    |           |                      |                                                                                                           |
| 204439_at   | 1,67  | 0,13    | IFI44L    | Hs.389724            | interferon-induced protein 44-like                                                                        |
| 201559_s_at | 1,66  | 0,06    | CLIC4     | Hs.440544            | chloride intracellular channel 4                                                                          |
| 201167_x_at | -1,64 | 0,13    | ARHGDI A  | Hs.159161            | Rho GDP dissociation inhibitor (GDI) alpha                                                                |
| 219312_s_at | 1,62  | 0,05    | ZBTB10    | Hs.205742            | zinc finger and BTB domain containing 10                                                                  |
| 41469_at    | 1,61  | 0,48    | PI3       | Hs.112341            | peptidase inhibitor 3, skin-derived (SKALP)                                                               |
| 213606_s_at | -1,59 | 0,14    | ARHGDI A  | Hs.159161            | Rho GDP dissociation inhibitor (GDI) alpha                                                                |
| 212952_at   | -1,57 | 0,1     | CALR      | Hs.507541, Hs.515162 | calreticulin                                                                                              |
| 216834_at   | 1,57  | 0,19    | RGS1      | Hs.75256             | regulator of G-protein signalling 1                                                                       |
| 210662_at   | 1,56  | 0,05    | KYNU      | Hs.470126            | kynureninase (L-kynurenine hydrolase)                                                                     |
| 216056_at   | 1,55  | 0,36    | CD44      | Hs.459142, Hs.502328 | CD44 antigen (Indian blood group)                                                                         |
| 203213_at   | 1,52  | 0,08    | CDC2      | Hs.334562            | cell division cycle 2, G1 to S and G2 to M                                                                |
| 214370_at   | -1,51 | 0,35    | S100A8    | Hs.416073            | S100 calcium binding protein A8 (calgranulin A)                                                           |
| 221419_s_at | -1,49 | 0,32    | DUSP23    | Hs.425801            | dual specificity phosphatase 23                                                                           |
| 207425_s_at | -1,49 | 0,13    | SEPT9     | Hs.440932            | septin 9                                                                                                  |
| 217793_at   | -1,48 | 0,16    | RAB11B    | Hs.433888            | RAB11B, member RAS oncogene family                                                                        |
| 209629_s_at | 1,48  | 0,02    | NXT2      | Hs.25010             | nuclear transport factor 2-like export factor 2                                                           |
| 220322_at   | 1,46  | 0,3     | IL1F9     | Hs.211238            | interleukin 1 family, member 9                                                                            |
| 201625_s_at | 1,43  | 0,02    | INSIG1    | Hs.520819            | insulin induced gene 1                                                                                    |
| 221851_at   | -1,41 | 0,04    | LOC90379  | Hs.443636            |                                                                                                           |
| 210004_at   | 1,41  | 0,31    | OLR1      | Hs.412484            | oxidised low density lipoprotein (lectin-like) receptor 1                                                 |
| 203096_s_at | 1,39  | 0,1     | RAPGEF2   | Hs.113912            | Rap guanine nucleotide exchange factor (GEF) 2                                                            |
| 207674_at   | 1,38  | 0,12    | FCAR      | Hs.193122            | Fc fragment of IgA, receptor for                                                                          |
| 210818_s_at | 1,38  | 0,08    | BACH1     | Hs.154276            | BTB and CNC homology 1, basic leucine zipper transcription factor 1                                       |
| 205307_s_at | 1,36  | 0,01    | KMO       | Hs.409081            | kynurenine 3-monooxygenase (kynurenine 3-hydroxylase)                                                     |
| 218010_x_at | -1,32 | 0,15    | C20orf149 | Hs.79625             | chromosome 20 open reading frame 149                                                                      |
| 214059_at   | 1,32  | 0,17    | IFI44     | Hs.82316             | interferon-induced protein 44                                                                             |
| 221078_s_at | 1,32  | 0,1     | KIAA1212  | Hs.292925, Hs.567537 | KIAA1212                                                                                                  |
| 206295_at   | 1,3   | 0,09    | IL18      | Hs.83077             | interleukin 18 (interferon-gamma-inducing factor)                                                         |
| 206675_s_at | 1,29  | 0,06    | SKIL      | Hs.536655            | SKI-like                                                                                                  |
| 206700_s_at | -1,28 | 0,25    | SMCY      | Hs.80358             | Smcy homolog, Y-linked (mouse)                                                                            |
| 204747_at   | 1,28  | 0,18    | IFIT3     | Hs.47338             | interferon-induced protein with tetratricopeptide repeats 3                                               |
| 214746_s_at | -1,27 | 0,13    | ZNF467    | Hs.112158            | zinc finger protein 467                                                                                   |
| 202988_s_at | 1,26  | 0,14    | RGS1      | Hs.75256             | regulator of G-protein signalling 1                                                                       |
| 214001_x_at | -1,26 | 0,42    | FLJ20294  | Hs.584932            |                                                                                                           |
| 207798_s_at | -1,25 | 0,03    | ATXN2L    | Hs.460499            | ataxin 2-like                                                                                             |
| 36829_at    | -1,24 | 0,03    | PER1      | Hs.445534            | period homolog 1 (Drosophila)                                                                             |
| 203751_x_at | -1,24 | 0,04    | JUND      | Hs.2780              | jun D proto-oncogene                                                                                      |
| 209281_s_at | 1,24  | 0,09    | ATP2B1    | Hs.506276            | ATPase, Ca++ transporting, plasma membrane 1                                                              |
| 205179_s_at | -1,24 | 0,13    | ADAM8     | Hs.501574            | ADAM metallopeptidase domain 8                                                                            |
| 211823_s_at | -1,24 | 0,01    | PXN       | Hs.446336            | paxillin                                                                                                  |
| 207901_at   | 1,24  | 0,12    | IL12B     | Hs.674               | interleukin 12B (natural killer cell stimulatory factor 2, cytotoxic lymphocyte maturation factor 2, p40) |
| 203504_s_at | 1,23  | 0,15    | ABCA1     | Hs.429294, Hs.522675 | ATP-binding cassette, sub-family A (ABC1), member 1                                                       |
| 210458_s_at | 1,23  | 0,08    | TANK      | Hs.132257            | TRAF family member-associated NFKB activator                                                              |
| 205660_at   | 1,22  | 0,13    | OASL      | Hs.118633            | 2'-5'-oligoadenylate synthetase-like                                                                      |
| 203810_at   | 1,22  | 0,01    | DNAJB4    | Hs.380282            | DnaJ (Hsp40) homolog, subfamily B, member 4                                                               |
| 212979_s_at | 1,22  | 0,04    | KIAA0738  | Hs.406492            |                                                                                                           |
| 210692_s_at | 1,21  | 0,13    | SLC43A3   | Hs.99962             | solute carrier family 43, member 3                                                                        |
| 201879_at   | 1,21  | 0,06    | ARIH1     | Hs.268787            | ariadne homolog, ubiquitin-conjugating enzyme E2 binding protein, 1 (Drosophila)                          |

|             |       |      |           |                      |                                                                                                    |
|-------------|-------|------|-----------|----------------------|----------------------------------------------------------------------------------------------------|
| 214792_x_at | -1,21 | 0,16 | VAMP2     | Hs.25348             | vesicle-associated membrane protein 2 (synaptobrevin 2)                                            |
| 204614_at   | 1,21  | 0,07 | SERPINB2  | Hs.514913            | serpin peptidase inhibitor, clade B (ovalbumin), member 2                                          |
| 201556_s_at | -1,2  | 0,18 | VAMP2     | Hs.25348             | vesicle-associated membrane protein 2 (synaptobrevin 2)                                            |
| 200935_at   | -1,2  | 0,15 | CALR      | Hs.507541, Hs.515162 | calreticulin                                                                                       |
| 212572_at   | 1,18  | 0,2  | STK38L    | Hs.184523            | serine/threonine kinase 38 like                                                                    |
| 219017_at   | 1,18  | 0,01 | ETNK1     | Hs.29464, Hs.584930  | ethanolamine kinase 1                                                                              |
| 201295_s_at | 1,17  | 0,24 | WSB1      | Hs.446017            | WD repeat and SOCS box-containing 1                                                                |
| 217966_s_at | 1,17  | 0,12 | C1orf24   | Hs.518662            | chromosome 1 open reading frame 24                                                                 |
| 219869_s_at | 1,17  | 0,28 | SLC39A8   | Hs.288034            | solute carrier family 39 (zinc transporter), member 8                                              |
| 210571_s_at | 1,17  | 0,04 | CMAH      | Hs.484918            | cytidine monophosphate-N-acetylneuraminic acid hydroxylase (CMP-N-acetylneuraminate monooxygenase) |
| 201909_at   | -1,16 | 0,16 | RPS4Y1    | Hs.282376            | ribosomal protein S4, Y-linked 1                                                                   |
| 210790_s_at | 1,16  | 0,02 | SAR1A     | Hs.499960            | SAR1 gene homolog A ( <i>S. cerevisiae</i> )                                                       |
| 206620_at   | -1,16 | 0,11 | GRAP      | Hs.567416            | GRB2-related adaptor protein                                                                       |
| 203124_s_at | 1,15  | 0,15 | SLC11A2   | Hs.505545            | solute carrier family 11 (proton-coupled divalent metal ion transporters), member 2                |
| 204533_at   | 1,15  | 0,15 | CXCL10    | Hs.413924            | chemokine (C-X-C motif) ligand 10                                                                  |
| 214041_x_at | -1,15 | 0,18 | RPL37A    | Hs.433701            | ribosomal protein L37a                                                                             |
| 205732_s_at | 1,15  | 0,06 | NCOA2     | Hs.446678            | nuclear receptor coactivator 2                                                                     |
| 38158_at    | 1,14  | 0,11 | ESPL1     | Hs.153479            | extra spindle poles like 1 ( <i>S. cerevisiae</i> )                                                |
| 213831_at   | 1,14  | 0,19 | HLA-DQA1  | Hs.387679, Hs.555872 | major histocompatibility complex, class II, DQ alpha 1                                             |
| 214787_at   | 1,14  | 0    | DENND4A   | Hs.513817            | DENN/MADD domain containing 4A                                                                     |
| 214453_s_at | 1,13  | 0,06 | IFI44     | Hs.82316             | interferon-induced protein 44                                                                      |
| 202558_s_at | 1,13  | 0,04 | STCH      | Hs.352341            | stress 70 protein chaperone, microsome-associated, 60kDa                                           |
| 40489_at    | -1,13 | 0,07 | ATN1      | Hs.143766            | atrophin 1                                                                                         |
| 205000_at   | -1,11 | 0,26 | DDX3Y     | Hs.99120             | DEAD (Asp-Glu-Ala-Asp) box polypeptide 3, Y-linked                                                 |
| 204363_at   | 1,11  | 0,28 | F3        | Hs.62192             | coagulation factor III (thromboplastin, tissue factor)                                             |
| 221785_at   | -1,11 | 0,22 | WIZ       | Hs.442138            |                                                                                                    |
| 216036_x_at | -1,1  | 0    | WDTC1     | Hs.469154            | WD and tetratricopeptide repeats 1                                                                 |
| 203358_s_at | 1,1   | 0,02 | EZH2      | Hs.444082            | enhancer of zeste homolog 2 ( <i>Drosophila</i> )                                                  |
| 220832_at   | 1,09  | 0,39 | TLR8      | Hs.272410            | toll-like receptor 8                                                                               |
| 210117_at   | 1,09  | 0    | SPAG1     | Hs.492373            | sperm associated antigen 1                                                                         |
| 213976_at   | -1,09 | 0,03 | CIZ1      | Hs.212395            | CDKN1A interacting zinc finger protein 1                                                           |
| 212720_at   | 1,09  | 0,11 | PAPOLA    | Hs.253726            | poly(A) polymerase alpha                                                                           |
| 201564_s_at | 1,08  | 0,08 | FSCN1     | Hs.118400            | fascin homolog 1, actin-bundling protein ( <i>Strongylocentrotus purpuratus</i> )                  |
| 218600_at   | -1,08 | 0,13 | LIMD2     | Hs.514402            | LIM domain containing 2                                                                            |
| 211605_s_at | -1,08 | 0,06 | RARA      | Hs.535499            | retinoic acid receptor, alpha                                                                      |
| 206471_s_at | 1,07  | 0,18 | PLXNC1    | Hs.584845            | plexin C1                                                                                          |
| 212623_at   | 1,07  | 0,1  | TMEM41B   | Hs.501868            | transmembrane protein 41B                                                                          |
| 213490_s_at | -1,07 | 0,01 | MAP2K2    | Hs.465627            | mitogen-activated protein kinase kinase 2                                                          |
| 213826_s_at | -1,07 | 0,62 | H3F3A     | Hs.533624            | H3 histone, family 3A                                                                              |
| 208255_s_at | -1,07 | 0,06 | FKBP8     | Hs.173464            | FK506 binding protein 8, 38kDa                                                                     |
| 219859_at   | 1,07  | 0,35 | CLEC4E    | Hs.236516            | C-type lectin domain family 4, member E                                                            |
| 209392_at   | 1,06  | 0,27 | ENPP2     | Hs.190977            | ectonucleotide pyrophosphatase/phosphodiesterase 2 (autotaxin)                                     |
| 209803_s_at | 1,06  | 0,32 | PHLDA2    | Hs.154036            | pleckstrin homology-like domain, family A, member 2                                                |
| 208047_s_at | 1,05  | 0,09 | NAB1      | Hs.107474            | NGFI-A binding protein 1 (EGR1 binding protein 1)                                                  |
| 205400_at   | -1,05 | 0,14 | WAS       | Hs.2157              | Wiskott-Aldrich syndrome (eczema-thrombocytopenia)                                                 |
| 220266_s_at | 1,05  | 0,13 | KLF4      | Hs.376206            | Kruppel-like factor 4 (gut)                                                                        |
| 211816_x_at | 1,04  | 0,35 | FCAR      | Hs.193122            | Fc fragment of IgA, receptor for                                                                   |
| 212470_at   | 1,04  | 0,07 | SPAG9     | Hs.463439, Hs.589068 | sperm associated antigen 9                                                                         |
| 201951_at   | 1,04  | 0,01 | ALCAM     | Hs.150693            | activated leukocyte cell adhesion molecule                                                         |
| 213299_at   | -1,04 | 0,15 | ZBTB7A    | Hs.465623            | zinc finger and BTB domain containing 7A                                                           |
| 217502_at   | 1,03  | 0,09 | IFIT2     | Hs.437609            | interferon-induced protein with tetratricopeptide repeats 2                                        |
| 214678_x_at | 1,03  | 0,14 | ZFX       | Hs.370424            | zinc finger protein, X-linked                                                                      |
| 207978_s_at | 1,03  | 0,25 | NR4A3     | Hs.279522            | nuclear receptor subfamily 4, group A, member 3                                                    |
| 204371_s_at | -1,02 | 0,15 | KHSRP     | Hs.91142             | KH-type splicing regulatory protein (FUSE binding protein 2)                                       |
| 216015_s_at | 1,02  | 0,28 | CIAS1     | Hs.159483            | cold autoinflammatory syndrome 1                                                                   |
| 219558_at   | 1,01  | 0,15 | ATP13A3   | Hs.529609            | ATPase type 13A3                                                                                   |
| 205787_x_at | 1,01  | 0,02 | LOC441155 |                      |                                                                                                    |
| 218548_x_at | -1,01 | 0,03 | TEX264    | Hs.512675, Hs.517864 | testis expressed sequence 264                                                                      |
| 207691_x_at | 1     | 0,34 | ENTPD1    | Hs.374230            | ectonucleoside triphosphate diphosphohydrolase 1                                                   |

**Supplementary file 2c.** Probe sets with (uncorrected) t-test p-value < 0.001 ( base level gene expression was compared between survivors and controls)

|             | logFC | p-value |         |           |                                                                                      |
|-------------|-------|---------|---------|-----------|--------------------------------------------------------------------------------------|
| 212712_at   | -0,29 | 0,0000  | CAMSAP1 | Hs.522493 | calmodulin regulated spectrin-associated protein 1                                   |
| 203003_at   | 0,23  | 0,0001  | MEF2D   | Hs.314327 | MADS box transcription enhancer factor 2, polypeptide D (myocyte enhancer factor 2D) |
| 218376_s_at | 0,6   | 0,0003  | MICAL1  | Hs.33476  | microtubule associated monooxygenase, calponin and LIM domain containing 1           |
| 33850_at    | 0,52  | 0,0003  | MAP4    | Hs.517949 | microtubule-associated protein 4                                                     |
| 203749_s_at | 0,38  | 0,0005  | RARA    | Hs.535499 | retinoic acid receptor, alpha                                                        |
| 216091_s_at | -0,21 | 0,0005  | BTRC    | Hs.500812 | beta-transducin repeat containing                                                    |
| 202957_at   | 0,23  | 0,0008  | HCLS1   | Hs.14601  | hematopoietic cell-specific Lyn substrate 1                                          |

**Supplementary file 2d.** Probe sets with (uncorrected) t-test p-value < 0.001 (comparison of LPS responsiveness between survivors and controls)

|             | logFC | p-value |          |           |                                                            |
|-------------|-------|---------|----------|-----------|------------------------------------------------------------|
| 200664_s_at | -0,74 | 0,0000  | DNAJB1   | Hs.515210 | DnaJ (Hsp40) homolog, subfamily B, member 1                |
| 207805_s_at | -0,44 | 0,0001  | PSMD9    | Hs.131151 | proteasome (prosome, macropain) 26S subunit, non-ATPase, 9 |
| 211300_s_at | -0,52 | 0,0001  | TP53     | Hs.408312 | tumor protein p53 (Li-Fraumeni syndrome)                   |
| 201873_s_at | 0,33  | 0,0001  | ABCE1    | Hs.12013  | ATP-binding cassette, sub-family E (OABP), member 1        |
| 203110_at   | -0,62 | 0,0002  | PTK2B    | Hs.491322 | PTK2B protein tyrosine kinase 2 beta                       |
| 214512_s_at | 0,37  | 0,0002  | SUB1     | Hs.229641 | SUB1 homolog (S. cerevisiae)                               |
| 203320_at   | 0,3   | 0,0003  | LNK      | Hs.506784 |                                                            |
| 39705_at    | 0,66  | 0,0004  | SIN3B    | Hs.13999  | SIN3 homolog B, transcription regulator (yeast)            |
| 221708_s_at | -0,27 | 0,0004  | UNC45A   | Hs.389461 | unc-45 homolog A (C. elegans)                              |
| 216036_x_at | -1,1  | 0,0005  | WDTC1    | Hs.469154 | WD and tetratricopeptide repeats 1                         |
| 212096_s_at | 0,39  | 0,0005  | MTUS1    | Hs.7946   | mitochondrial tumor suppressor 1                           |
| 200803_s_at | 0,34  | 0,0006  | TEGT     | Hs.35052  | testis enhanced gene transcript (BAX inhibitor 1)          |
| 202064_s_at | 0,67  | 0,0006  | SEL1L    | Hs.181300 | sel-1 suppressor of lin-12-like (C. elegans)               |
| 207722_s_at | -0,68 | 0,0006  | BTBD2    | Hs.465543 | BTB (POZ) domain containing 2                              |
| 203194_s_at | 0,87  | 0,0007  | NUP98    | Hs.524750 | nucleoporin 98kDa                                          |
| 220048_at   | 0,18  | 0,0007  | EDAR     | Hs.171971 | ectodysplasin A receptor                                   |
| 216091_s_at | 0,24  | 0,0008  | BTRC     | Hs.500812 | beta-transducin repeat containing                          |
| 221839_s_at | 0,6   | 0,0008  | UBAP2    | Hs.493739 | ubiquitin associated protein 2                             |
| 219226_at   | 0,79  | 0,0009  | CRKRS    | Hs.416108 | Cdc2-related kinase, arginine/serine-rich                  |
| 203480_s_at | 0,56  | 0,0009  |          |           |                                                            |
| 208132_x_at | -0,33 | 0,0010  | BAT2     | Hs.436093 | HLA-B associated transcript 2                              |
| 219559_at   | 0,49  | 0,0010  | C20orf59 | Hs.512686 | chromosome 20 open reading frame 59                        |

**Supplementary file 3.** Validation of in silico gene expression measurement by real time PCR

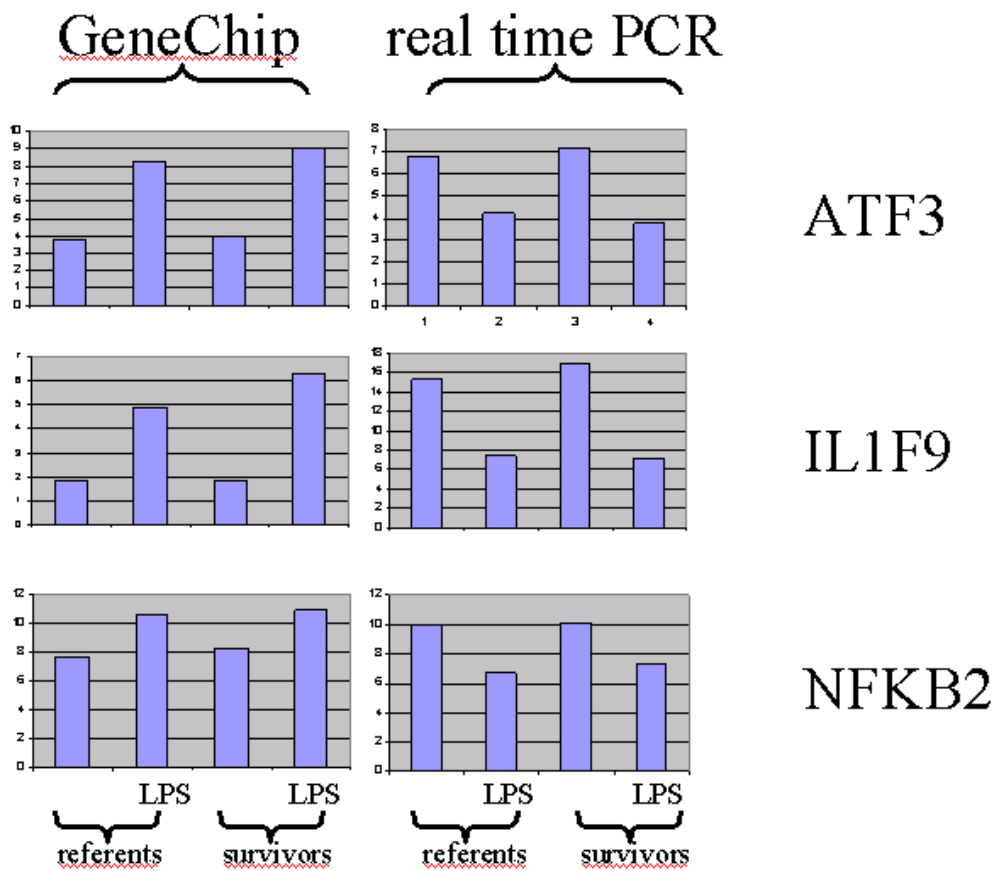

Comparison of normalized U133A expression values (left panel) and normalized real time PCR data (delta CT) for three genes. Base level gene expression and gene expression upon LPS were recorded.

The GeneChip values are mean expression values (log2 transformed) from three pooled array experiments.

The real time PCR panel show mean deltaT values from 10 stroke survivors and from 9 healthy control subjects. High deltaT values indicate that a high number of PCRcycles is required to reach the standardized T-level – which implies that the initial number of template mRNA molecules was correspondingly low. Data from one of the control subjects were not evaluated due to unreliable amplification of the GAPDH standard.

U133A Data:

|       |             | control |      |      | control +LPS |       |       | survivor |      |      | survivor+LPS |       |       |
|-------|-------------|---------|------|------|--------------|-------|-------|----------|------|------|--------------|-------|-------|
| ATF3  | 202672_s_at | 3,60    | 3,70 | 4,09 | 8,25         | 8,01  | 8,48  | 4,36     | 3,58 | 3,92 | 9,28         | 8,79  | 9,05  |
| IL1F9 | 220322_at   | 1,92    | 1,87 | 1,89 | 5,62         | 2,64  | 6,33  | 1,89     | 1,88 | 1,86 | 6,91         | 5,31  | 6,72  |
| NFKB2 | 207535_s_at | 7,56    | 7,96 | 7,51 | 10,02        | 10,58 | 11,07 | 8,18     | 8,19 | 8,43 | 10,74        | 10,60 | 11,38 |

Real time PCR data

|                                 | <b>ATF3</b>      |           |     | <b>IL1F9</b>     |           |      | <b>NFKB2</b>     |           |     |
|---------------------------------|------------------|-----------|-----|------------------|-----------|------|------------------|-----------|-----|
|                                 | base level<br>CT | LPS<br>CT | CT  | base level<br>CT | LPS<br>CT | CT   | base level<br>CT | LPS<br>CT | CT  |
| <b>stroke survivors</b>         |                  |           |     |                  |           |      |                  |           |     |
| A-750                           | 8,2              | 5,4       | 2,8 | 17,6             | 8,9       | 8,7  | 9,9              | 6,1       | 3,8 |
| A-751                           | 6,8              | 5,9       | 0,9 | 16,4             | 9,1       | 7,3  | 10,2             | 6,6       | 3,6 |
| A-763                           | 6,6              | 3,1       | 3,5 | 15,8             | 5,5       | 10,3 | 8                | 4         | 4   |
| A-773                           | 8                | 4,8       | 3,2 | 18,5             | 7,5       | 11   | 8                | 5,4       | 2,6 |
| A-777                           | 7,9              | 4,4       | 3,5 | 20,3             | 6,8       | 13,5 | 11,7             | 7,9       | 3,8 |
| 691                             | 6,4              | 3,1       | 3,3 | 17,8             | 6,5       | 11,3 | 10,3             | 7,1       | 3,2 |
| 778                             | 7,7              | 3         | 3,7 | 17,3             | 7,1       | 10,2 | 12,6             | 7,4       | 5,2 |
| 781                             | 7,1              | 2,9       | 4,2 | 17,1             | 5,7       | 11,4 | 10,9             | 6,3       | 4,6 |
| 787                             | 7                | 2,8       | 4,2 | 15,1             | 5,1       | 10   | 11,3             | 6,5       | 4,8 |
| 788                             | 6,5              | 2,8       | 3,7 | 13,6             | 10,2      | 3,4  | 9                | 15,5      | 6,5 |
| <b>healthy control subjects</b> |                  |           |     |                  |           |      |                  |           |     |
| A-688                           | 5,4              | 4,2       | 1,2 | 16               | 6,5       | 9,5  | 8,5              | 5,7       | 2,8 |
| A-690                           | 6,9              | 4,2       | 2,7 | 15,8             | 9,9       | 5,9  | 11,2             | 7,8       | 3,6 |
| A-697                           | 6,7              | 4,3       | 2,4 | 14,8             | 7,2       | 7,6  | 8                | 4,8       | 3,2 |
| A-758                           | 6,6              | 4         | 2,6 | 17,6             | 7,9       | 9,7  | 10,8             | 8,2       | 2,6 |
| 683                             | 6,1              | 4,4       | 1,7 | 14,4             | 7,4       | 7    | 9,6              | 6,7       | 2,9 |
| 766                             | 7,4              | 5,8       | 1,6 | 14,9             | 8,4       | 6,5  | 9,4              | 7,6       | 1,8 |
| 767                             | 7,4              | 3,9       | 3,5 | 12,6             | 6,7       | 5,9  | 10               | 6,9       | 3,1 |
| 768                             | 6,9              | 3,2       | 3,7 | 14,2             | 6,2       | 8    | 9,4              | 6,2       | 3,2 |
| 770                             | 7,7              | 3,8       | 3,9 | 17,7             | 6         | 11,7 | 12,3             | 6,6       | 5,7 |

RNA from stroke survivors A-750, A751, A763, A773 and A777 as well as from healthy referents A688, A690, A697 and A758 was quantified by both methods (real time PCR and GeneChip technology). The other stroke survivors and healthy control subjects were newly recruited subjects: RNA from their cells was quantified only by real time PCR.

CT is the mean difference between the Ct value of the standard reaction (GAPDH) and the analyzed gene. Each reaction was run in threefold. CT is the difference of between CTs measured in LPS-treated cells and non-treated cells.
